# Supplementary material for: Three new AIE-cored luminescent Cd-based MOFs with high quantum yields and selective detection of ions in aqueous media
Source: Royal Society of Chemistry journal article supplement (doi:10.1039/d4ce00446a), 2024-01-01
Supplement: d4ce00446a1.pdf [file d4ce00446a1.pdf]

## Supporting Information

### **Three new AIE-cored Luminescent Cd-based MOF with high quantum yields and selective detection of ions in aqueous media**

Wei-Min Chen,<sup>a</sup> Yi Zhang,<sup>a</sup> Zhen-Dong Xue,<sup>a</sup> Hao-Yu Zhu,<sup>a</sup> Qiang Gao,<sup>a</sup> Li-Zhuang Chen<sup>a</sup> and Fang-Ming Wang<sup>\*,a</sup>

<sup>a</sup> *School of Environmental and Chemical Engineering, Jiangsu University of Science and Technology, Zhenjiang, Jiangsu 212003, China Email: [wangfmzj@qq.com](mailto:wangfmzj@qq.com)*

**Table S1. Selected bond lengths (Å) and bond angles (°) of LMOF-1**

| Bond     | Dist.    | Bond     | Dist.    | Bond     | Dist.    |
|----------|----------|----------|----------|----------|----------|
| Cd-N1    | 2.292(2) | Cd-O1    | 2.383(8) | Cd-O3    | 2.000(6) |
| Cd-N2    | 2.381(8) | Cd-O2    | 2.324(6) | Cd-O4    | 2.372(4) |
| Angle    | (°)      | Angle    | (°)      | Angle    | (°)      |
| N1-Cd-N2 | 98.4(3)  | O1-Cd-O2 | 55.9(2)  | O3-Cd-O4 | 87.9(3)  |
| N1-Cd-O3 | 107.2(3) | N2-Cd-O1 | 84.9(3)  | O2-Cd-O4 | 88.3(3)  |

**Table S2. Selected bond lengths (Å) and bond angles (°) of LMOF-2**

| Bond      | Dist.    | Bond      | Dist.    | Bond      | Dist.    |
|-----------|----------|-----------|----------|-----------|----------|
| Cd1-N1    | 2.312    | Cd1-O1    | 2.574(9) | Cd1-O3    | 2.303(7) |
| Cd1-N2    | 2.360(3) | Cd1-O2    | 2.2770   | Cd1-O4    | 2.555(4) |
| Angle     | (°)      | Angle     | (°)      | Angle     | (°)      |
| N1-Cd1-N2 | 84.2(3)  | O1-Cd1-O2 | 52.5(3)  | O3-Cd1-O4 | 53.6(2)  |
| N1-Cd1-O4 | 87.0(2)  | N2-Cd1-O1 | 89.1(2)  | O2-Cd1-O3 | 83.6(3)  |

**Table S3. Selected bond lengths (Å) and bond angles (°) of LMOF-3**

| Bond      | Dist.      | Bond      | Dist.     | Bond      | Dist.      |
|-----------|------------|-----------|-----------|-----------|------------|
| Cd1-N1    | 2.338(9)   | Cd1-O1    | 2.359(2)  | Cd1-O3    | 2.213(9)   |
| Cd1-N2    | 2.326(7)   | Cd1-O2    | 2.400(8)  | Cd1-O4    | 2.2320     |
| Cd2-N3    | 2.338(9)   | Cd2-O5    | 2.400(8)  | Cd2-O7    | 2.2320     |
| Cd2-N4    | 2.326(7)   | Cd2-O6    | 2.359(2)  | Cd2-O8    | 2.213(9)   |
| Angle     | (°)        | Angle     | (°)       | Angle     | (°)        |
| N2-Cd1-N1 | 175.66(14) | O4-Cd1-N1 | 90.15(71) | O1-Cd1-O2 | 55.08(11)  |
| O3-Cd1-N1 | 94.44(71)  | O1-Cd1-N2 | 81.02(81) | O3-Cd1-O4 | 119.36(91) |
| O5-Cd2-O7 | 90.51(41)  | N4-Cd2-O8 | 89.17(41) | N3-Cd2-O6 | 93.96(01)  |

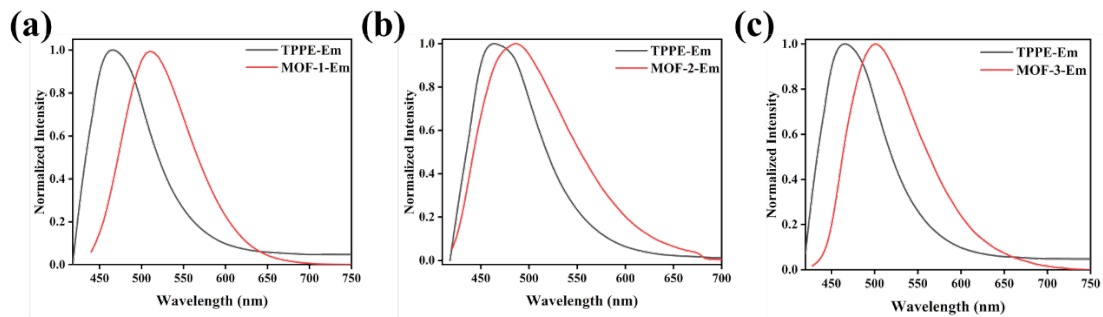

**Fig. S1.** (a) Emission spectra: (a) LMOF-1 and TPPE, (b) LMOF-2 and TPPE, (c) LMOF-3 and TPPE.

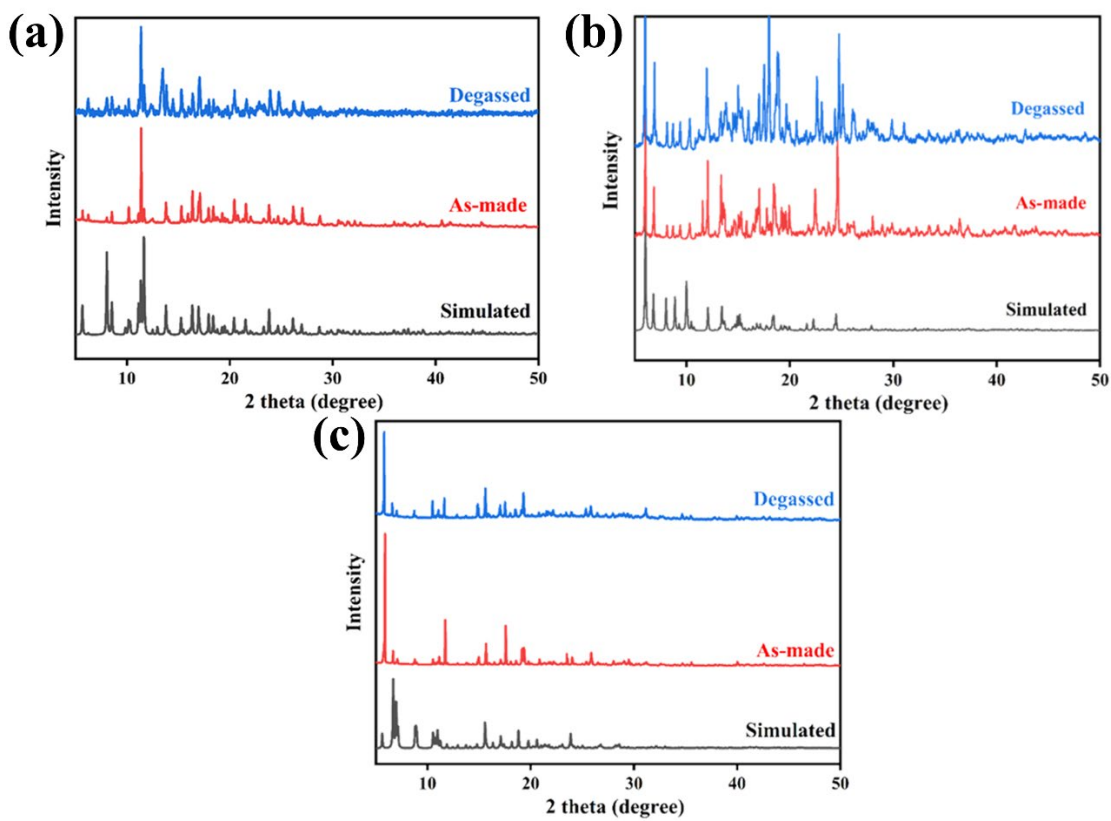

**Fig. S2.** PXRD pattern of (a) LMOF-1, (b) LMOF-2, (c) LMOF-3.

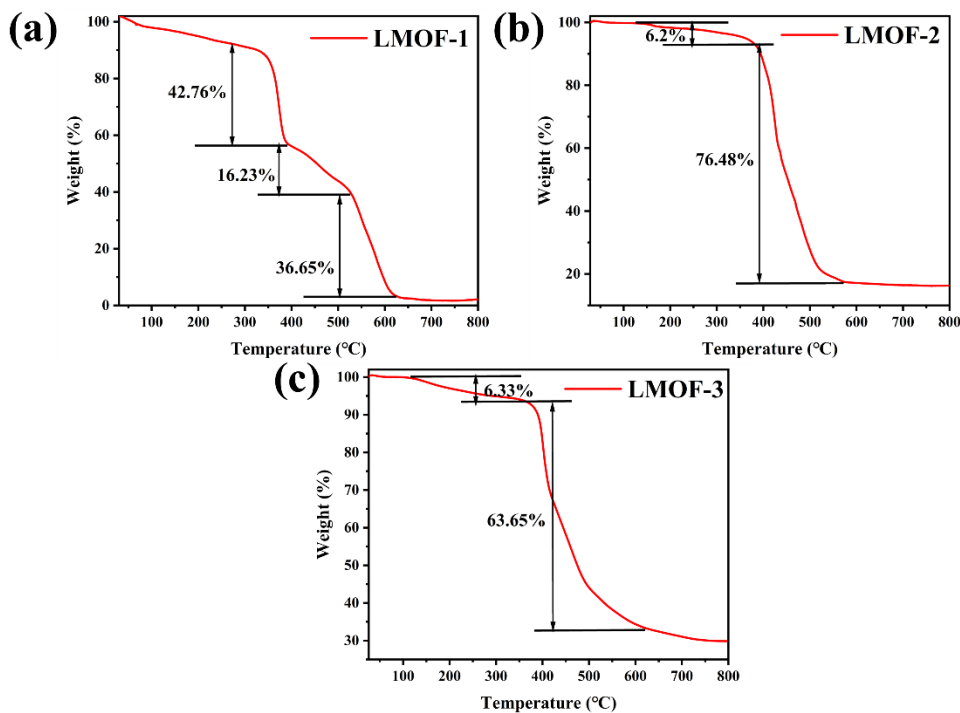

Fig. S3. Thermogravimetric analysis curve of (a) LMOF-1, (b) LMOF-2, (c) LMOF-3.

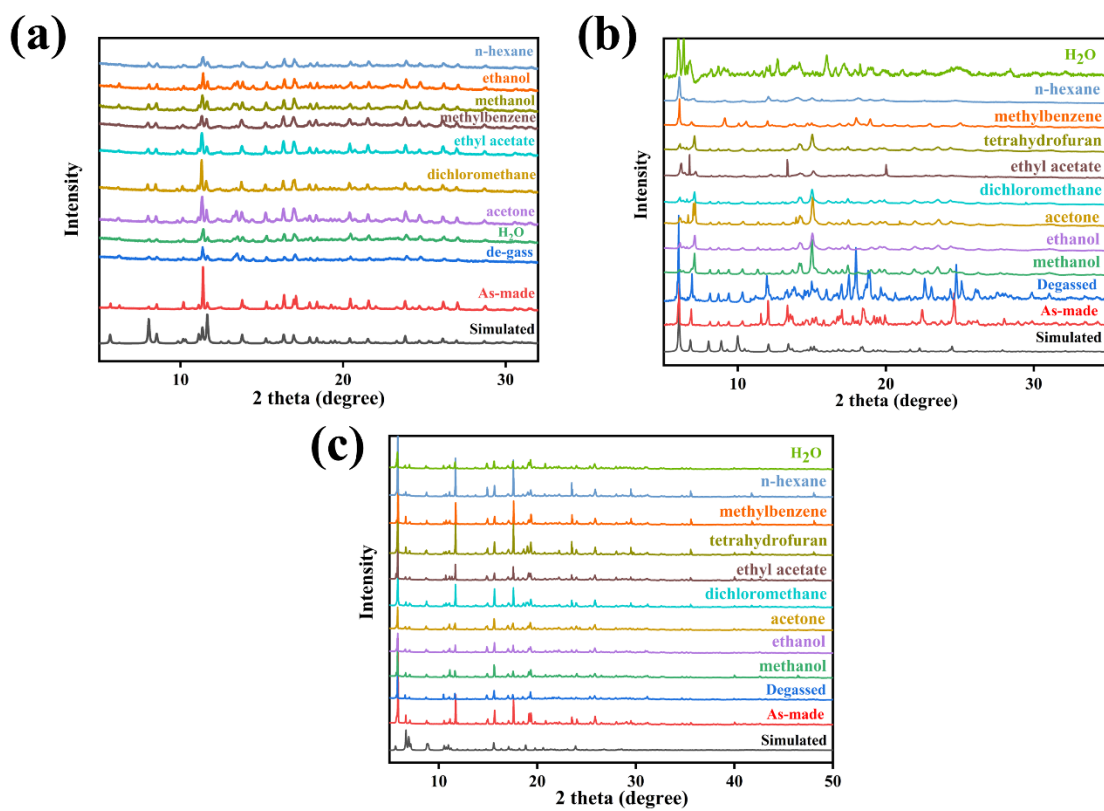

Fig. S4. PXRD patterns of (a) LMOF-1, (b) LMOF-2, (c) LMOF-3 after overnight soaking in various solvents.

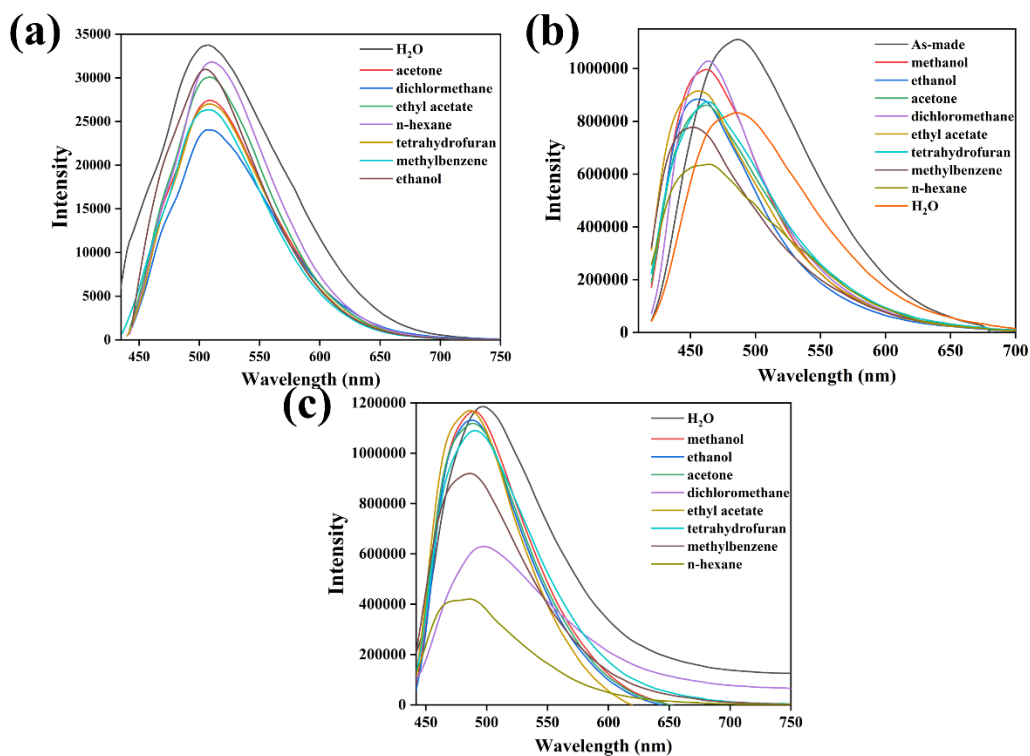

**Fig. S5.** Emission spectra of (a) LMOF-1, (b) LMOF-2, (c) LMOF-3 after soaking in various solvents for 24 hours.

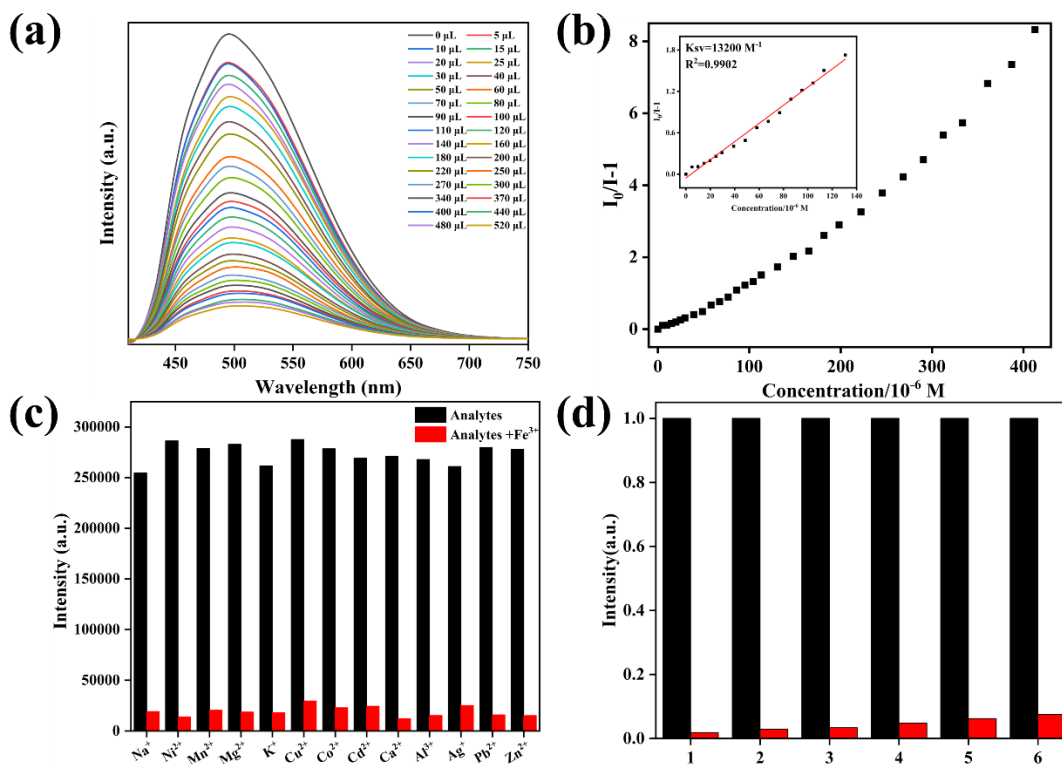

**Fig. S6.** (a) Intensity change diagram of gradually adding  $\text{Fe}^{3+}$  solution, (b) S-V fitting curve of  $\text{Fe}^{3+}$ , (c) Anti-interference experiment with the addition of other ions, (d) Cyclic repetitive experiment in detecting  $\text{Fe}^{3+}$  in water, of LMOF-1 suspension.

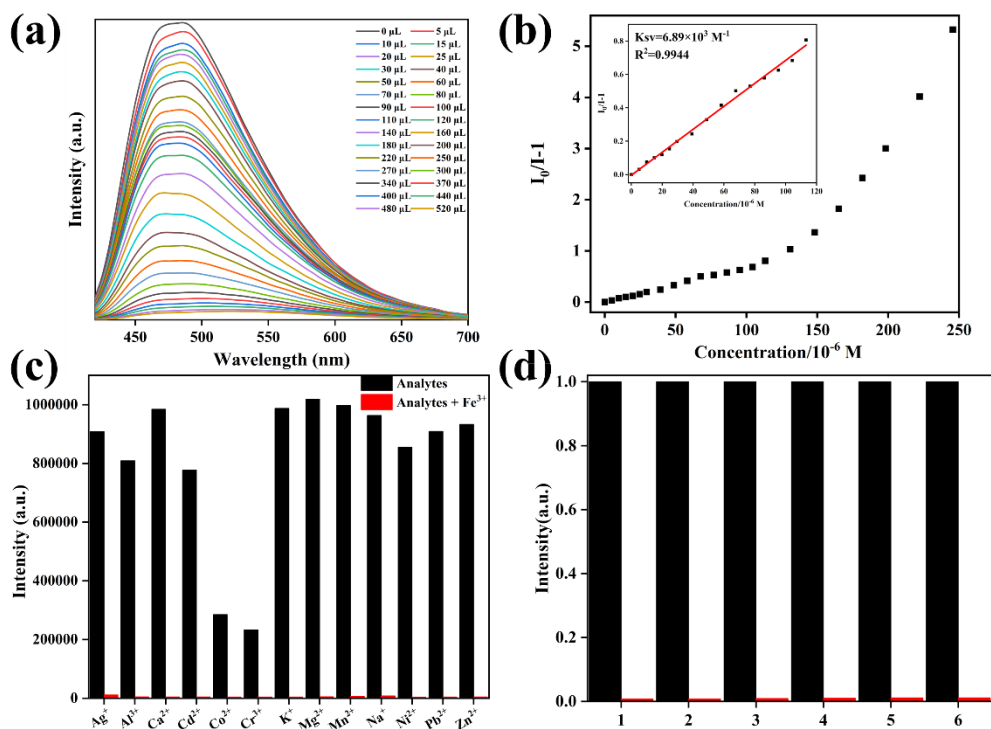

**Fig. S7.** (a) Intensity change diagram of gradually adding  $\text{Fe}^{3+}$  solution, (b) S-V fitting curve of  $\text{Fe}^{3+}$ , (c) Anti-interference experiment with the addition of other ions, (d) Cyclic repetitive experiment in detecting  $\text{Fe}^{3+}$  in water, of **LMOF-2** suspension.

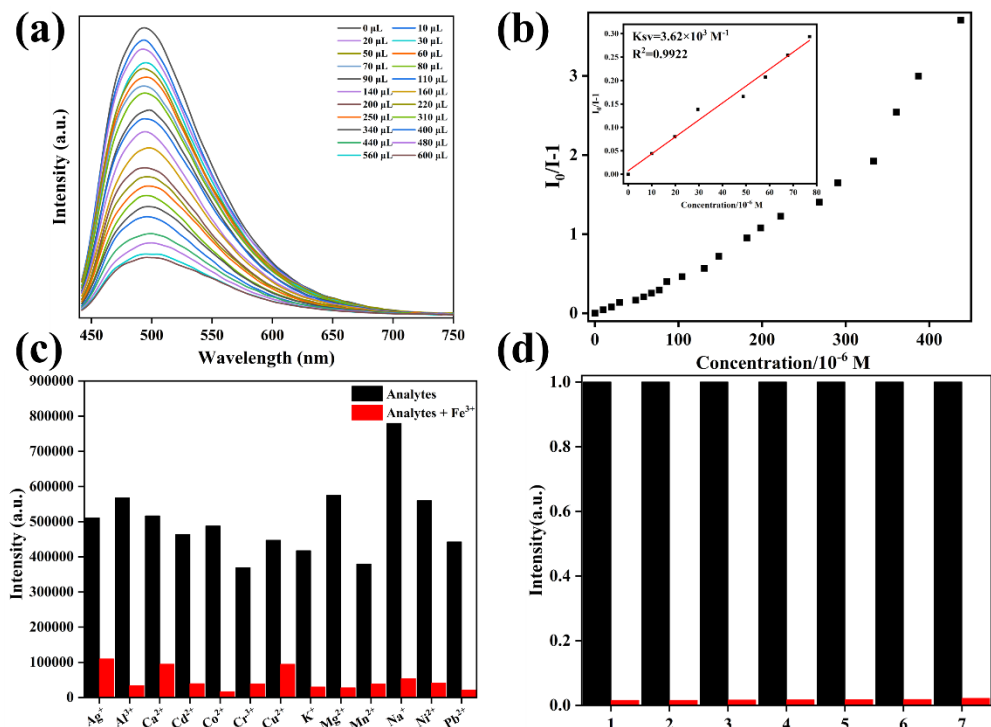

**Fig. S8.** (a) Intensity change diagram of gradually adding  $\text{Fe}^{3+}$  solution, (b) S-V fitting curve of  $\text{Fe}^{3+}$ , (c) Anti-interference experiment with the addition of other ions, (d) Cyclic repetitive experiment in detecting  $\text{Fe}^{3+}$  in water, of **LMOF-3** suspension.

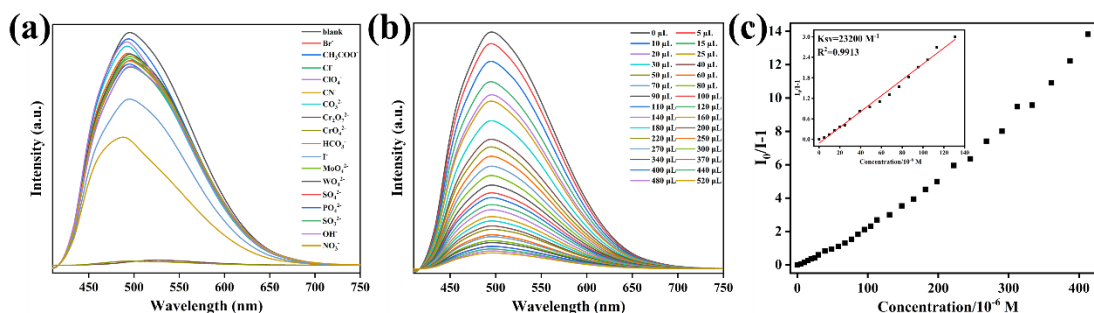

**Fig. S9.** (a) The luminescence spectra of LMOF-1 suspension upon adding different anions. (b) The fluorescence intensity trend chart of LMOF-1 after adding CrO<sub>4</sub><sup>2-</sup> solution. (c) The SV curves of LMOF-1 after adding CrO<sub>4</sub><sup>2-</sup> solution. (d) Anti-interference experiment of selective recognition of CrO<sub>4</sub><sup>2-</sup>. (e) Reproducibility experiment of LMOF-1 in detecting CrO<sub>4</sub><sup>2-</sup> in water

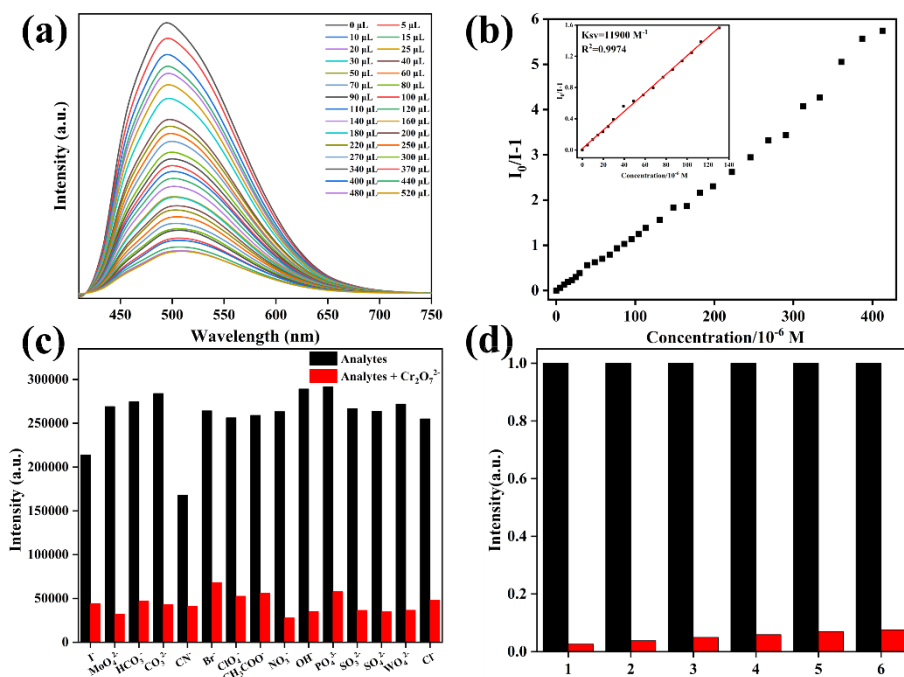

**Fig. S10.** (a) The fluorescence intensity trend chart of LMOF-1 after adding Cr<sub>2</sub>O<sub>7</sub><sup>2-</sup> solution. (b) The SV curves of LMOF-1 after adding Cr<sub>2</sub>O<sub>7</sub><sup>2-</sup> solution. (c) Anti-interference experiment of selective recognition of Cr<sub>2</sub>O<sub>7</sub><sup>2-</sup>. (d) Reproducibility experiment of LMOF-1 in detecting Cr<sub>2</sub>O<sub>7</sub><sup>2-</sup> in water

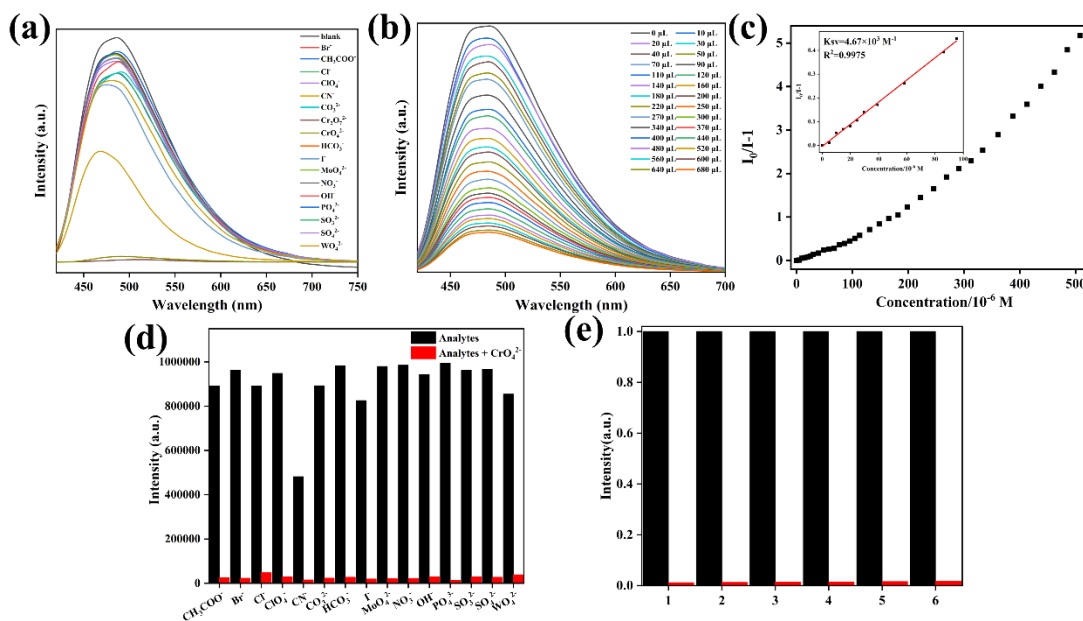

**Fig. S11.** (a) The luminescence spectra of LMOF-2 suspension upon adding different anions. (b) The fluorescence intensity trend chart of LMOF-2 after adding CrO<sub>4</sub><sup>2-</sup> solution. (c) The SV curves of LMOF-2 after adding CrO<sub>4</sub><sup>2-</sup> solution. (d) Anti-interference experiment of selective recognition of CrO<sub>4</sub><sup>2-</sup>. (e) Reproducibility experiment of LMOF-2 in detecting CrO<sub>4</sub><sup>2-</sup> in water

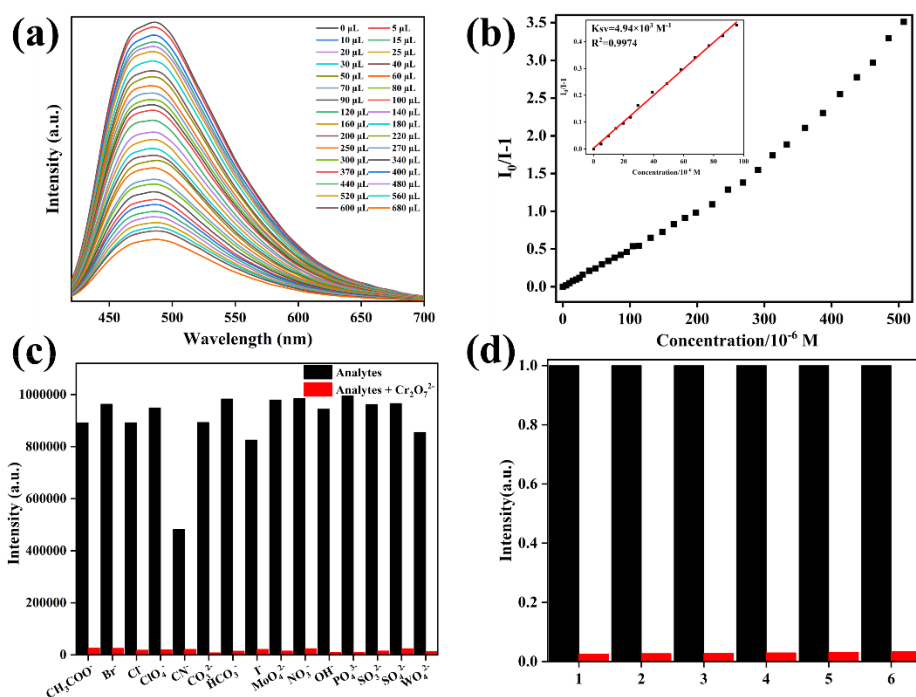

**Fig. S12.** (a) The fluorescence intensity trend chart of LMOF-2 after adding Cr<sub>2</sub>O<sub>7</sub><sup>2-</sup> solution. (b) The SV curves of LMOF-2 after adding Cr<sub>2</sub>O<sub>7</sub><sup>2-</sup> solution. (c) Anti-interference experiment of selective recognition of Cr<sub>2</sub>O<sub>7</sub><sup>2-</sup>. (d) Reproducibility experiment of LMOF-2 in detecting Cr<sub>2</sub>O<sub>7</sub><sup>2-</sup> in water



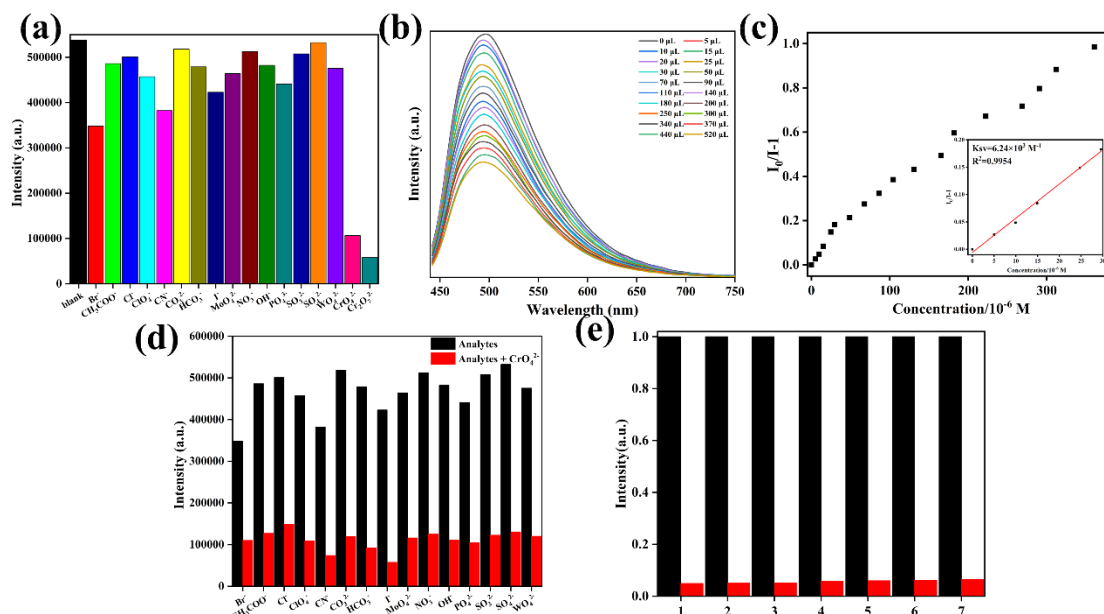

**Fig. S13.** (a) The luminescence spectra of LMOF-3 suspension upon adding different anions. (b) The fluorescence intensity trend chart of LMOF-3 after adding  $\text{CrO}_4^{2-}$  solution. (c) The SV curves of LMOF-3 after adding  $\text{CrO}_4^{2-}$  solution. (d) Anti-interference experiment of selective recognition of  $\text{CrO}_4^{2-}$ . (e) Reproducibility experiment of LMOF-3 in detecting  $\text{CrO}_4^{2-}$  in water

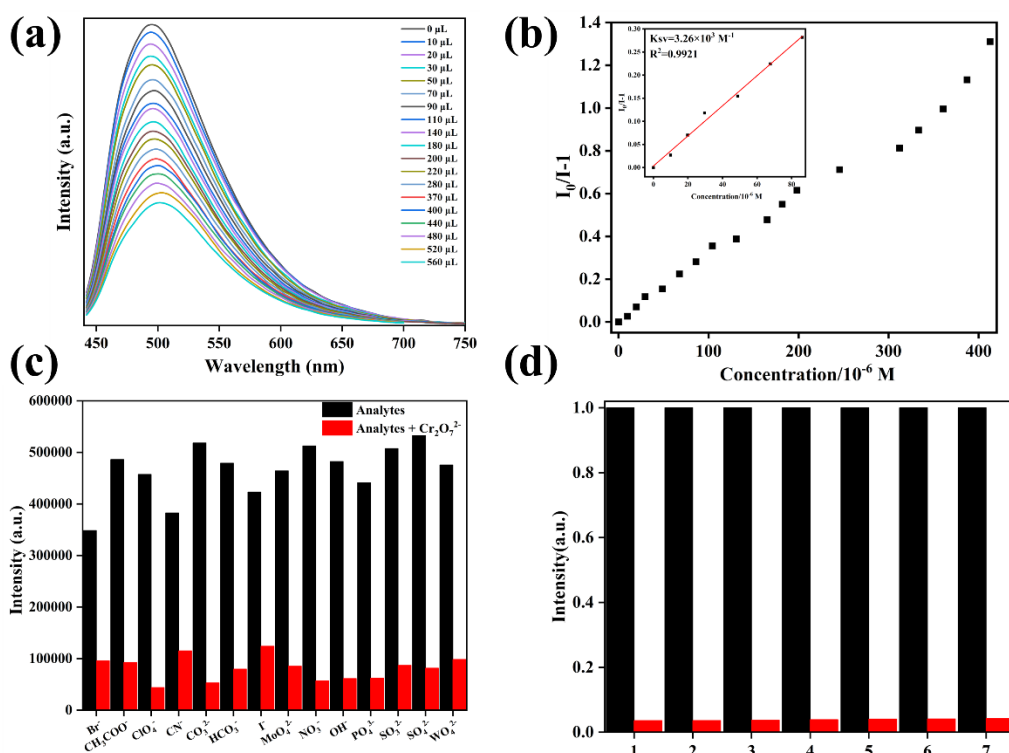

**Fig. S14.** (a) The fluorescence intensity trend chart of LMOF-3 after adding  $\text{Cr}_2\text{O}_7^{2-}$  solution. (b) The SV curves of LMOF-3 after adding  $\text{Cr}_2\text{O}_7^{2-}$  solution. (c) Anti-interference experiment of selective recognition of  $\text{Cr}_2\text{O}_7^{2-}$ . (d) Reproducibility experiment of LMOF-3 in detecting  $\text{Cr}_2\text{O}_7^{2-}$  in water

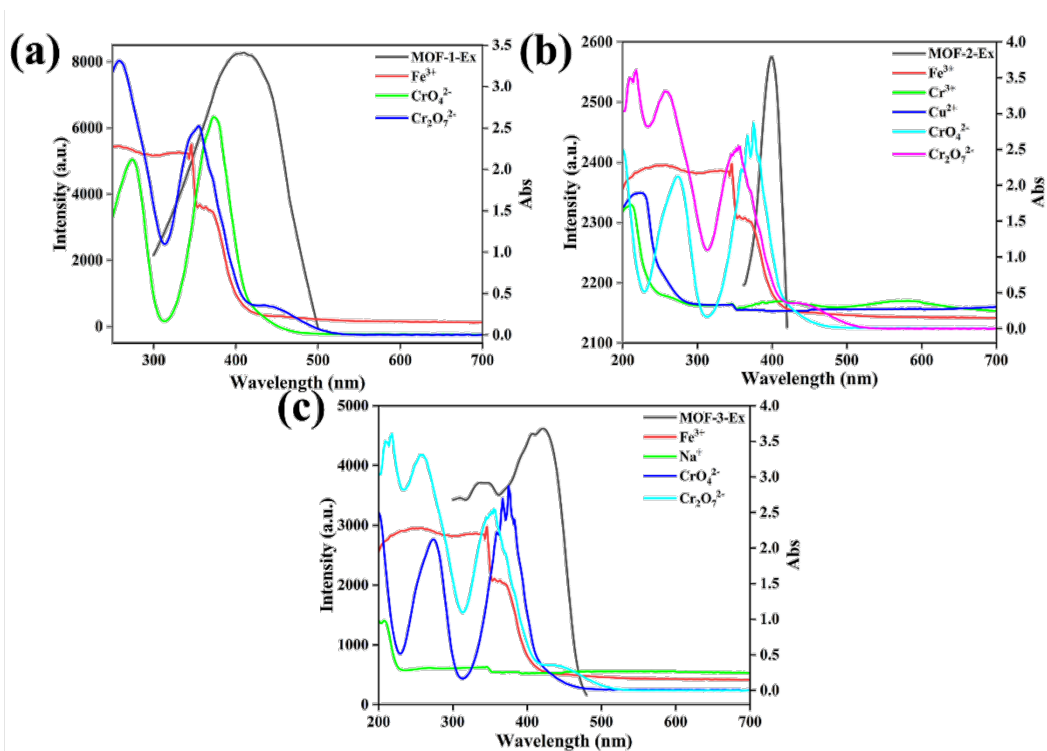

**Fig. S15.** (a) The UV-vis absorption spectra of  $\text{Fe}^{3+}$ ,  $\text{CrO}_4^{2-}$  and  $\text{Cr}_2\text{O}_7^{2-}$  and the excitation spectra of **LMOF-1**. (b) The UV-vis absorption spectra of  $\text{Fe}^{3+}$ ,  $\text{Cr}^{3+}$ ,  $\text{Cu}^{2+}$ ,  $\text{CrO}_4^{2-}$  and  $\text{Cr}_2\text{O}_7^{2-}$  and the excitation spectra of **LMOF-2**. (c) The UV-vis absorption spectra of  $\text{Fe}^{3+}$ ,  $\text{Na}^+$ ,  $\text{CrO}_4^{2-}$  and  $\text{Cr}_2\text{O}_7^{2-}$  and the excitation spectra of **LMOF-3**.

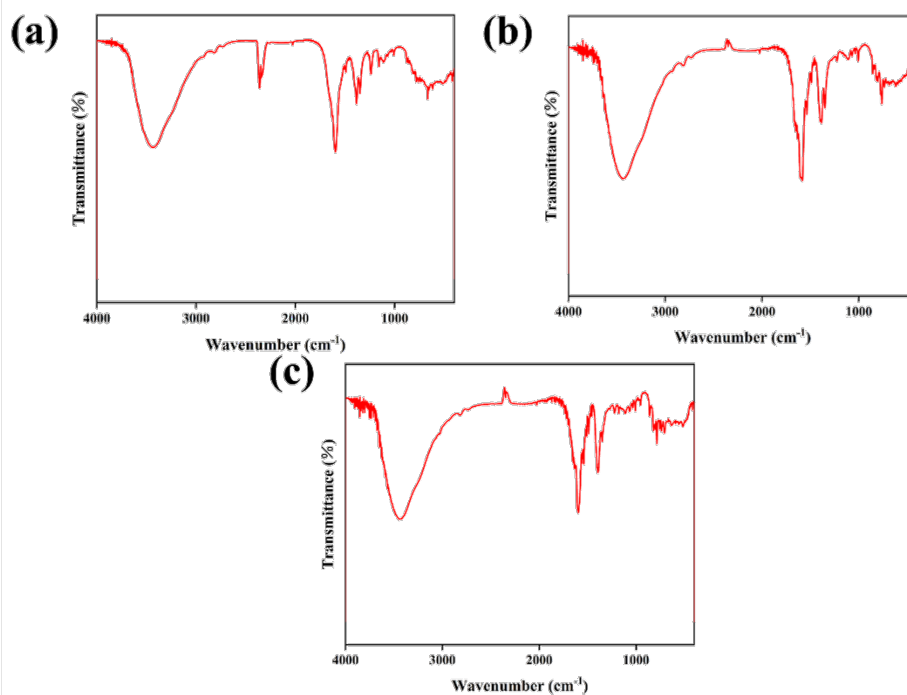

**Fig. S16.** FT-IR of (a) **LMOF-1**, (b) **LMOF-2**, (c) **LMOF-3**.
